# Supplementary material for: Printed Electrodes Based on Vanadium Dioxide and Gold Nanoparticles for Asymmetric Supercapacitors
Source: MDPI journal article supplement (doi:10.3390/nano13182567), 2023-09-16
Supplement: s1 [file s1]

# Printed Electrodes Based on Vanadium Dioxide and Gold Nanoparticles for Asymmetric Supercapacitors

Bashaer A. Minyaw <sup>1</sup>, Mohammad Vaseem <sup>2</sup>, Nuha A. Alhebshi <sup>1,\*</sup>, Amal M. Al-Amri <sup>3</sup>, and Atif Shamim <sup>2</sup>

<sup>1</sup> Department of Physics, Faculty of Science, King Abdulaziz University, Jeddah 21589, Saudi Arabia; bmakhdhurminyaw@stu.kau.edu.sa, nalhebshi@kau.edu.sa

<sup>2</sup> IMPACT Lab, Computer, Electrical and Mathematical Sciences and Engineering (CEMSE) Division, King Abdullah University of Science and Technology (KAUST), Thuwal 23955–6900, Kingdom of Saudi Arabia; mohammad.vaseem@kaust.edu.sa, atif.shamim@kaust.edu.sa

<sup>3</sup> Department of Physics, College of Science and Arts, King Abdulaziz University, Rabigh 21911, Saudi Arabia; amsalamri@kau.edu.sa

\* Correspondence: nalhebshi@kau.edu.sa

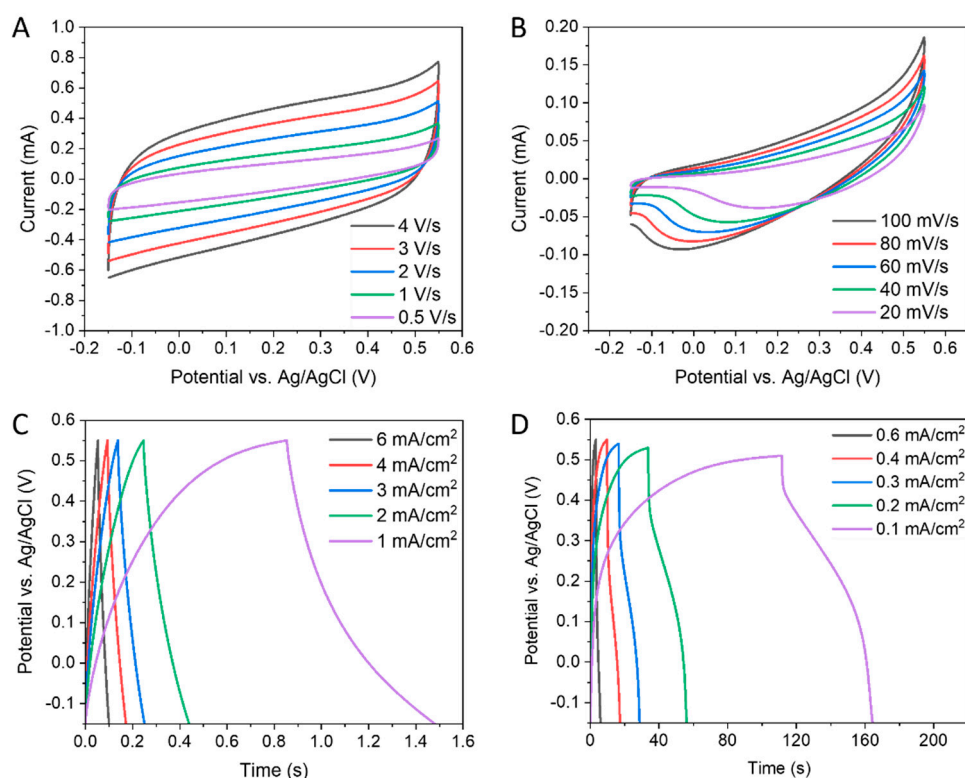

**Figure S1.** Electrochemical Performance of VO<sub>2</sub> Electrode from -0.15 to 0.55 V. (A, B) CV curves.

(C, D) GCD curves.

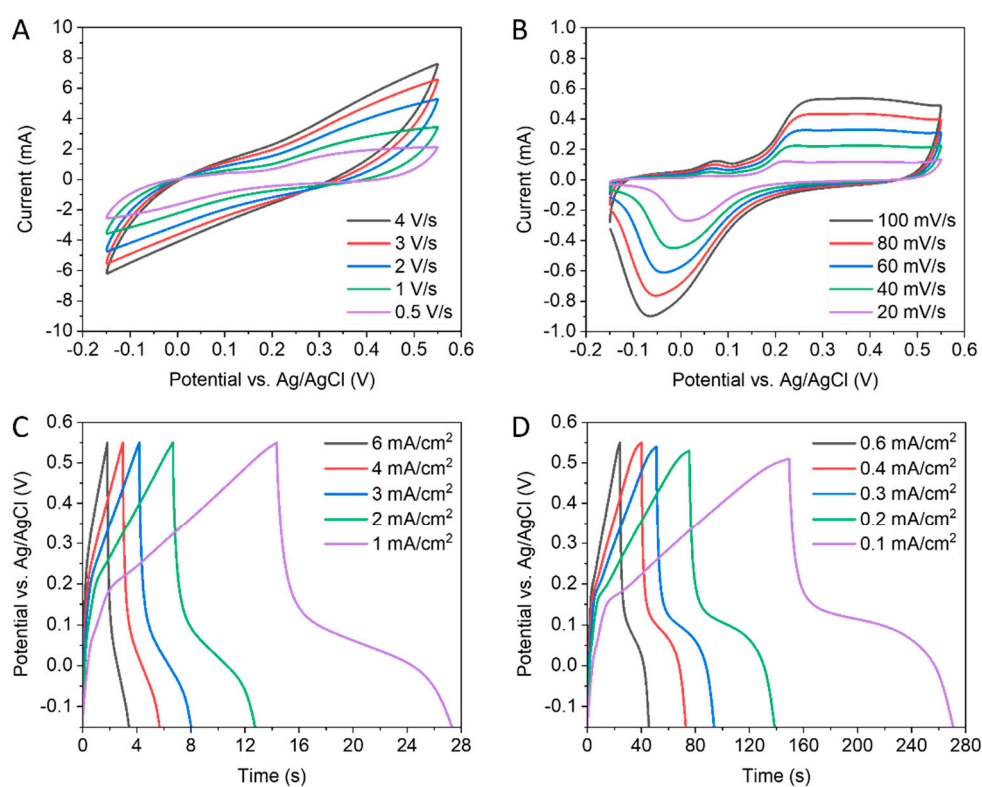

**Figure S2.** Electrochemical Performance of Au Electrode from -0.15 to 0.55 V: (A, B) CV curves.

(C, D) GCD curves.
